# Supplementary material
Source: Elsevier journal article supplement (https://www.sciencedirect.com/science/article/pii/S0210569120300607)
Supplement: mmc2 [file S0210569120300607:mmc2.pdf]

## **ANEXO B. Recomendaciones generales en las que no se aplicó el Sistema GRADE**

### *a. Mantenimiento y cuidados de accesos vasculares, sondas, y drenajes*

#### *Fundamentación*

El paciente neurocrítico requiere procedimientos y sistemas invasivos imprescindibles para el monitoreo de variables clínicas y la administración de fármacos, fluidos y alimentación. Entre los pilares de la terapéutica se encuentran el prevenir y corregir insultos secundarios y terciarios. Se denomina injuria terciaria a aquellos insultos que sobrevienen durante la estadía en cuidados intensivos que tienen impacto negativo sobre el resultado final; destacándose las infecciones (urinaria, respiratoria, sepsis por catéter, ventriculitis); la reacción adversa a drogas o a productos sanguíneos, las mecánicas asociadas a accesos vasculares o ventilación mecánica (Biotrauma, Volutrauma) o las que sobrevienen como consecuencia de la inmovilización prolongada (ulceras por decúbito, trombosis venosa profunda). Evitarlas resulta fundamental.

#### *Evidencia Clínica*

Al ser práctica cotidiana en las unidades de cuidados intensivos, los cuidados de accesos venosos, arteriales, sondas nasogástricas o nasoyeyunales, urinarias, tubos de avenamiento pleural, los cuidados y criterios de actuación para mantener los mismos y evitar complicaciones, se encuentran estandarizados y validados con la finalidad de reducir variabilidad clínica como así también los riesgos de mal función, mal posicionamiento y/o infecciones<sup>1-7</sup>. Al mismo tiempo las recomendaciones vigentes están destinadas a otorgar confort y seguridad<sup>1-7</sup>.

#### *Recomendaciones*

- ✓ Procedimientos de inserción de dispositivos por parte de personal entrenado utilizando técnica aséptica.
- ✓ Imprescindible higiene de manos previo a la inserción o manipuleo de los mismos.
- ✓ Utilizar guantes estériles al manipular.
- ✓ Utilizar en la medida de lo posible sistemas cerrados o con el menor número posible de conexiones (llaves tres vías).
- ✓ No manipular ni desconectar el sistema innecesariamente.
- ✓ De existir fugas o rotura proceder al recambio inmediato.
- ✓ Fijación adecuada para evitar desplazamientos o desconexiones.
- ✓ Mantener solo el tiempo necesario.
- ✓ En el caso de sondas vesicales emplear siliconadas con el menor calibre posible.
- ✓ Etiquetar (fecha de inserción).
- ✓ Proteger los sistemas durante el aseo general.
- ✓ Observar el lugar de inserción diariamente monitorizando signos de inflamación.
- ✓ Cambio de apósitos o gasas sucias, húmedas o despegadas.
- ✓ Limpieza diaria del sitio de inserción con suero salino desde el centro a la periferia previo seguido por la misma maniobra pero con el antiséptico elegido.
- ✓ De acuerdo a disponibilidad, cubrir con apósito transparente, semipermeable o de gasa estéril.

*b. Cuidados en el mantenimiento de los catéteres para monitoreo de presión intracraneana (PIC) y presión tisular de Oxígeno (PtiO<sub>2</sub>)*

*Fundamentación*

El monitoreo de la presión intracraneal (PIC) es de amplia utilización en el TEC severo<sup>8</sup>. El valor de la PIC diagnostica una situación: hipertensión endocraneana, determina PPC, en ocasiones desencadena intervenciones, evalúa los resultados de las mismas y puede auxiliar a establecer el pronóstico<sup>8</sup>. Los sistemas de monitoreo son variados en complejidad, metodología empleada y obviamente en costos, limitante fundamental para su aplicación rutinaria en nuestra región<sup>8-13</sup>. Además, el monitoreo de la PIC no está exento de complicaciones, entre las que se incluyen: infección, hemorragia, mal funcionamiento del monitor, obstrucción o posición no adecuada del catéter<sup>8-13</sup>. Las complicaciones pueden estar asociadas con lecturas erróneas del valor de la PIC, y el consiguiente impacto en la morbilidad del paciente e incluso con el incremento de los costos<sup>8-13</sup>.

Los catéteres empleados para monitorizar oxigenación tisular del parénquima encefálico, son más sofisticados y susceptibles de medición errónea, Las complicaciones son similares a las de los sensores de PIC<sup>8</sup>.

*Evidencia Clínica*

Las guías vigentes de manejo del TEC severo y de monitoreo multimodal han establecido con claridad las características técnicas que deben tener los catéteres de monitoreo como así también han fijado pautas para una correcta interpretación de las lecturas obtenidas<sup>8</sup>. Solo aquí y siguiendo la premisa del apartado anterior sugerimos ciertos puntos a nuestro entender necesarios para el mantenimiento y cuidados de dicho sistemas de monitoreo. La mayoría de estudios han reportado que hay poca diferencia de la medición entre los catéteres intraparenquimatosos y los intraventriculares<sup>8-13</sup>. Cuando es importante, la causa usual es error humano en el encerado del catéter ventricular o el daño del sensor dentro del parénquima<sup>8-13</sup>. Un reciente meta-análisis en relación a la seguridad del monitoreo de la PIC, concluyó que<sup>14</sup>:

- El promedio de error entre mediciones simultáneas es pequeño (1.5 a 1.6 mm Hg), de todas maneras, hasta en el 30% de lecturas podría exceder +/- 6 mm Hg.
- Cuando existe gradiente Intracraneal como en el caso de masas en expansión o hemorragia unilateral, es posible que las diferencias sean más grandes entre mediciones separadas.
- En ausencia de gradiente Intracraneal, el riesgo de mediciones inseguras es rara.

En lo que a complicaciones se refiere, los datos relacionados con la incidencia de hemorragia cerebral post-colocación, promedia el 1.1%; hematomas significativos que hayan requerido evacuación quirúrgica se ha reportado 0.5%<sup>8-14</sup>. Datos similares se han reportado para sensores de PtiO<sub>2</sub><sup>8</sup>.

El funcionamiento inadecuado u obstrucción del catéter intraventricular se ha visto hasta en un 6%<sup>8-13</sup>. No hay datos de esta complicación en el caso de catéter de fibra óptica.

La desventaja del catéter intraventricular es la elevada incidencia de infección. La incidencia de ventriculitis oscila entre 10 a 17%. Los factores de riesgo más relevantes son: sepsis, neumonía, cirugía, fractura deprimida y hemorragia intraventricular<sup>8-14</sup>.

La relación del tiempo de permanencia-incidencia de infección es un tema controversial. La infección, generalmente aparece durante los primeros 10 días, siendo menos frecuente los primeros 4 días. En este sentido se han propuesto distintas estrategias como el uso de antibióticos profilácticos durante el período de estancia del catéter intraventricular, antibiótico terapia solamente en el período de inserción

o recambio de catéteres luego del quinto día<sup>8-14</sup>. A la fecha no existe evidencia sólida para sugerir una u otra estrategia y la controversia continua.

#### *Recomendaciones*

- ✓ Seguir las pautas previamente señaladas en el apartado anterior (higiene de manos, fijación, curaciones, etc.)
- ✓ Controlar localización y posibilidad de complicaciones durante la inserción con tomografía craneal.
- ✓ En caso de ventriculostomía, de preferencia tunelizar el catéter.
- ✓ Calibrar diariamente ventriculostomía.
- ✓ Manipular lo menos posible.
- ✓ Emplear sistemas cerrados herméticamente.
- ✓ Establecer el cero de la columna líquida y el transductor a nivel del trago.
- ✓ En TEC grave no se aconseja el drenaje continuo de líquido cefalorraquídeo (LCR), sino intermitente, siguiendo el monitoreo de PIC.
- ✓ Drenar solo cuando es necesario, estableciendo dicho cohorte de manera multidisciplinaria.
- ✓ Controlar que la columna líquida oscile, se mantenga permeable y tenga forma pulsátil en el monitor.
- ✓ Evitar reflujos de LCR.
- ✓ Obtener una muestra basal de LCR al colocar el sistema y luego cada 48-72 horas para observar tendencias del recuento celular, niveles de glucosa y proteínas.
- ✓ Cultivar cuando se considere necesario.
- ✓ Al obtener muestra de LCR, NO ASPIRAR.
- ✓ Se debe retirar lo más pronto posible el catéter.
- ✓ No se recomienda utilizar antibióticos profilácticos.

#### *c. Trastornos de la motilidad del tubo digestivo*

##### *Fundamentación*

A pesar de la importancia que tiene la funcionalidad del tubo digestivo para el resto del organismo y de las interacciones que el mismo tiene con el encéfalo, muchas veces no son tenidas en cuenta o subvaloradas las repercusiones negativas que el daño cerebral ejerce sobre el tubo digestivo y viceversa. Las alteraciones del tracto digestivo en el TEC severo, están estrechamente asociadas con complicaciones de distinto grado de severidad, las cuales contribuyen a empeorar los resultados finales. En general estos trastornos son silenciosos y no son diagnosticadas sino se adopta la conducta de pesquisarlas en forma habitual, entre ellos el compromiso del tránsito intestinal.

##### *Evidencia Clínica*

Gastroparesia es una alteración de la motilidad gástrica que ocasiona retardo en el vaciamiento en ausencia de obstrucción<sup>15-16</sup>. Dicha complicación, retrasa la alimentación adecuada, prolonga estadías en UCI además de favorecer aspiración de contenido gástrico y neumonías<sup>15-16</sup>. Es muy frecuente, con una incidencia estimada del 50%, asociándose estrechamente con severidad de la injuria, e hipertensión endocraneana<sup>15-16</sup>. En los pacientes con trauma craneal severo se describen un perfil temporal de retraso en el vaciamiento durante las primeras 2 semanas post injuria con mejoría ulterior<sup>16</sup>. Otros factores que favorecen su instalación son inflamación, sepsis, trastornos hidroelectrolíticos (hipokalemia, hipomagnesemia), hiperglucemia, drogas de utilización frecuente (opioides, furosemda, hidantoina, anticolinérgicos, antiácidos, corticoides), disfunción renal y hepática<sup>15-19</sup>.

Varios agentes han demostrado eficacia como Proquinéticos (metoclopramida, domperidona, eritromicina, cinitapride) no habiendo estudios que avalen la utilización específica de algún agente sobre otro<sup>15-19</sup>.

La constipación es definida generalmente como la ausencia de eliminación de heces en un lapso de 72 horas después de la admisión o de manera más precisa se acepta en base a la presencia de tres parámetros: a) ausencia de las mismas en tres o más días; b) menos de 40 gramos de materia fecal en una deposición y/o c) materia fecal con menos del 60% de agua.<sup>20</sup>

La constipación en TCE grave, ha sido poco estudiada con una incidencia que oscila entre 2% al 27 %. Su presencia se asocia con resultados adversos<sup>21, 22</sup>. Los factores predisponentes son similares a gastroparesia<sup>22</sup>.

No se han descrito medidas profilácticas para prevenir la constipación, lo que es evidente es que la nutrición enteral temprana se asocia con el retorno precoz de la función intestinal. Las dietas enterales tipo estándar con fibra insoluble (polisacáridos de soya o mezclas de fibras) parecen ser efectivas para evitar la constipación, esta dieta disminuye el tiempo del tránsito colónico, modifica la consistencia de las heces, retrasan el vaciamiento gástrico, enlentecen la absorción de glucosa, disminuyen la absorción del colesterol y ácidos biliares.<sup>23, 24</sup>.

Los laxantes osmóticos como la lactulosa o el polietilenglicol que aumentan la peristalsis y la frecuencia de las evacuaciones éstos deben ser considerados como los medicamentos de primera elección<sup>25</sup>. Si no existe respuesta, los laxantes estimulantes que fomentan la secreción de agua y cloruro por inhibición de la bomba Na/K/ATPasa en el lumen colónico, como el bisacodilo, zen, cáscara sagrada y aloe), pueden tener mayor efectividad. Si existe impactación fecal es necesario utilizar enemas evacuantes<sup>25, 26</sup>.

Diarrea en TEC severo se la define como la presencia de mas de 5 deposiciones diarias o mas de dos con un volumen mayor a 1 litro en 24 horas. Es una complicación multifactorial con una prevalencia del 8 al 21%<sup>27,28</sup>. Infrecuente en fase aguda del TEC. Favorecen su aparición fiebre, hipotermia, hipoalbuminemia, sepsis y disfunción orgánica múltiple además del uso de antibióticos de amplio espectro, nutrición enteral y la temida colonización por *Clostridium difficile* (CD)<sup>28-30</sup>. Aproximadamente un tercio de los pacientes hospitalizados son portadores asintomáticos del CD, favorecidos por inmovilidad y/o estancia prolongada, uso de ciertos fármacos (ATB, omeprazol, proquinéticos), stress y por la severidad de la enfermedad que motivo la internación<sup>23, 24</sup>.

### *Recomendaciones*

- ✓ Monitorizar la función intestinal a diario.
- ✓ Registrar residuos gástricos, catarsis, tolerancia alimenticia.
- ✓ Alimentación enteral precoz.
- ✓ Evitar drogas gastropareticas y/o pro constipación
- ✓ Corrección de los trastornos hidroelectrolíticos.
- ✓ Control de glucemia.
- ✓ Dietas adecuadas bajo supervisión nutricionista.
- ✓ De ser necesario, empleo de Proquinéticos (drogas que aumentan la contractilidad antral, corrigen arritmias gástricas y mejoran la coordinación de los movimientos antroduodenales).
- ✓ Tratamiento inicial de la constipación además de las medidas de prevención analizadas, laxantes osmóticos.
- ✓ En caso de refractariedad, laxantes estimulantes
- ✓ De utilizar proquinéticos o laxantes, emplear cursos cortos, no superiores a una semana.

- ✓ Evitar utilización empírica y prolongada de antibióticos de amplio espectro.

d. Que estrategias emplear para el cuidado de la piel y la profilaxis de lesiones por presión?

#### *Fundamentación*

A pesar de ser evitables, las lesiones por presión (LP) continúan en incremento. 3-11% de los pacientes que ingresan en servicios hospitalarios desarrollan estas lesiones y cerca del 70% se desarrollan dentro de los primeros 15 días de hospitalización<sup>31-41</sup>. Las LP prolongan estadía, aumentan costos y empeoran los resultados finales<sup>31-41</sup>. En el TEC severo, se ha identificado numerosos factores de riesgo, entre ellos los que se destacan: coma, inmovilidad, nutrición inadecuada, deshidratación, Inmunosupresión, incontinencia esfinteriana y la coexistencia de comorbilidades<sup>31-41</sup>. Sin embargo, en términos de calidad de la asistencia sanitaria y de seguridad del paciente, las LP representan eventos adversos evitables que deterioran la calidad de vida del enfermo y pueden conducir a complicaciones graves y secuelas permanentes, por lo que su profilaxis y control tienen prioridad<sup>31-41</sup>.

#### *Evidencia Clínica*

El término úlcera por presión designa a una lesión de origen isquémico localizada en la piel y tejidos subyacentes<sup>31-41</sup>. Su extensión puede abarcar desde la epidermis, hasta el músculo. En los casos más graves puede afectar hueso y articulaciones. Aparecen rápidamente y son de lenta curación debido al daño progresivo de las capas de tejidos subyacentes a la piel dañada<sup>31-41</sup>.

Estas lesiones pueden aparecer en cualquier parte del cuerpo en correspondencia con las zonas que sufren el daño isquémico, aunque habitualmente se localizan en las zonas prominentes o de máximo relieve óseo en el paciente susceptible<sup>31-41</sup>.

En la génesis de las LP se involucran varios factores interrelacionados: presión, fricción, cizallamiento y tiempo de exposición, a los que se suman factores locales y generales. La presión, al actuar perpendicularmente, comprime las estructuras tisulares y capilares, de esta manera, el flujo sanguíneo resulta obstruido lo que genera isquemia, aumento de la permeabilidad capilar, vasodilatación, extravasación de líquidos e infiltración celular<sup>31-41</sup>. Este proceso inflamatorio causa una hiperemia reactiva cuya manifestación clínica es el eritema cutáneo.

Al cesar la presión este proceso puede ser reversible, si el eritema desaparece en 30 minutos y se restablece la perfusión. Por el contrario, si se prolonga en el tiempo el trastorno isquémico desemboca en fenómenos más complejos como la trombosis venosa y alteraciones degenerativas conducentes a la necrosis y ulceración<sup>31-41</sup>.

Por su parte la fricción actúa tangencialmente, y produce rozaduras que dañan la piel del paciente tanto sentado como encamado, en especial durante las movilizaciones activas o pasivas y deslizamientos. Como consecuencia se producen estiramientos, obstrucciones vasculares y lesión tisular. El cizallamiento combina los efectos de la presión y de la fricción y su resultado es el pinzamiento vascular<sup>31-41</sup>.

En adición, existen factores locales, también llamados extrínsecos, que contribuyen a la presentación de las LP en relación con la tolerancia de los tejidos a la humedad. La humedad, causada por la incontinencia urinaria y fecal, la sudoración profusa, el exudado proveniente de lesiones traumáticas o mal secado durante el aseo, la hiperhidrosis secundaria a tejidos o calzados oclusivos, disminuye la resistencia de la piel y propician su erosión y ulceración, así como aumentan el riesgo de infección<sup>31-41</sup>.

Finalmente, los factores generales o intrínsecos, contribuyen de forma decisiva a la formación de LP al condicionar alteraciones de la resistencia tisular, dado por disminución de la masa muscular, de la formación de colágeno, hipoperfusión de los tejidos. Estos factores se encuentran representados en la categoría de factores fisiopatológicos mencionada anteriormente<sup>31-41</sup>.

Existe consenso en la literatura especializada sobre el tema en que las LP son prevenibles y evitables.

Las guías para la prevención y tratamiento de las úlceras por presión, basadas en las mejores evidencias y reeditadas fueron elaboradas por representantes de tres asociaciones dedicadas a este tema<sup>31-41</sup>.

#### *Recomendaciones*

- ✓ Evaluación del riesgo mediante identificaciones de factores predisponentes, utilización de escalas clínicas generales (APACHE, SOFA) y específicas (Norton; etc) más juicio clínico.
- ✓ Observar y evaluar con regularidad, la piel y zonas de apoyo.
- ✓ Higiene adecuada de la piel con agua tibia y jabones neutros.
- ✓ Empleo de agentes hidratantes en individuos con piel seca.
- ✓ Evitar la exposición de la piel a la orina, materia fecal, drenajes de la herida y catéteres, mediante pañales desechables, hidratantes y barreras para la humedad.
- ✓ Reducir al mínimo la fricción y rozamientos mediante técnicas adecuadas de posición, traslado y cambios de posición.
- ✓ Vendajes protectores en los sitios de apoyo.
- ✓ Minimizar factores ambientales perjudiciales (baja humedad, y exposición al frío).
- ✓ Cambios de posición frecuente y movilización precoz.
- ✓ Evitar cargas mecánicas, para ello se recomiendan cambios de posición rotando los puntos de apoyo y la movilización precoz.
- ✓ En general, se recomiendan cambios de posición cada dos horas.
- ✓ Si no es posible realizar cambios de posición con la frecuencia deseada, se debe poner énfasis en el uso de superficies de apoyo adecuadas.
- ✓ Evitar el apoyo sobre las eminencias óseas, evitar la fricción y presión de dispositivos médicos y rozaduras de sábanas o ropa.
- ✓ Evitar deslizamientos hacia abajo que originen fricción.
- ✓ No se recomienda usar materiales semi sintéticos, ni flotadores para evitar el contacto con las superficies de apoyo.
- ✓ Cuidar la postura de los miembros del paciente, evitando posiciones viciosas o contracturas secundarias a la espasticidad y que empeoran los efectos de la presión y la fricción. En este sentido, los movimientos pasivos y el uso de férulas correctoras, debidamente protegidas para evitar las rozaduras, constituyen una medida de gran valor.
- ✓ Emplear colchones y otros dispositivos especializados que redistribuyen la presión, diseñados para repartir el peso de los tejidos.
- ✓ Soporte nutricional adecuado.
- ✓ Educación.
- ✓ Registro.

e. Posicionamiento y movilización del paciente con TEC severo?

#### *Fundamentación*

La movilización de los pacientes neurocríticos es un tema importante en el manejo de la hipertensión intracraneana especialmente en pacientes con trauma cráneo encefálico. Durante la estadía en UCI las tareas de los profesionales o técnicos a cargo involucran la movilización de los pacientes por muchos aspectos (baño, cambio de ropa de cama, procedimientos invasivos, traslados a servicios de imágenes<sup>42</sup>,<sup>43</sup>. La PIC se eleva significativamente durante los procedimientos de rutina en la UCI y si bien, la mayoría de estas elevaciones son transitorias, en ocasiones se prolonga la duración de la hipertensión intracraneana<sup>44</sup>. Por lo tanto, la realización de estas actividades exige un control clínico-neurológico-monitoreo multimodal estricto<sup>45</sup>. Este aspecto es fundamental para evitar complicaciones y prevenir el daño cerebral secundario, y actualmente el propuesto daño cerebral terciario por iatrogenia, por acción de la terapéutica o desconocimiento del manejo seguro del paciente<sup>42-45</sup>.

Existe evidencia concluyente respecto a la movilización del paciente crítico. Se ha demostrado que la rehabilitación temprana y oportuna es segura y beneficiosa<sup>42</sup>. Se deben evitar las posturas viciosas, utilizar férulas posicionales para la alineación de los miembros y promover movilización pasiva<sup>46</sup>. También debe ejercerse la profilaxis de las úlceras por presión, intensificando los cuidados de la piel, sobre todo en las superficies de apoyo óseo y áreas edematizadas. Se pueden utilizar almohadas, colchones neumáticos de inflado secuencial, apósitos de hidrocoloide, aerosoles siliconados, etc. teniendo en cuenta que el uso de cualquiera de estos accesorios, no reemplaza la movilización terapéutica del paciente<sup>47</sup>.

La excepción a las premisas señaladas es la hipertensión intracraneal severa o refractaria, y la inestabilidad hemodinámica, únicos casos considerados contraindicación absoluta de movilización. Tener presente el concepto de rehabilitación precoz y oportuna que surge de tratar de evitar las complicaciones que aparecen en la evolución natural de las lesiones neurocríticas, siempre considerando niveles de seguridad y manejo claro de la patología y sus posibles complicaciones<sup>48, 49</sup>.

### *Evidencia Clínica*

El posicionamiento se define como la colocación deliberada del paciente o de una parte o de todo el cuerpo para promover el bienestar fisiológico y / o psicológico. Varios tipos se emplean en pacientes críticos: supino, prono, decúbito lateral derecho, izquierdo, posición de Fowler y Trendelenburg<sup>50</sup>.

Decúbito semireclinado con elevación de la cabecera de la cama 30-45° debe considerarse para pacientes con nutrición enteral para prevenir la bronco aspiración y neumonía asociada a Ventilación mecánica (NAV). Múltiples guías recomiendan la posición entre 30° a 45° con dudas respecto a sus beneficios-riesgos. En una revisión reciente este decúbito ( $\geq 30^\circ$ ) puede reducir la NAV clínicamente sospechada en comparación con un decúbito supino de 0° a 10°<sup>51</sup>. Por otra parte, para mantener equilibrio de fluidos a nivel intracraneal, se recomienda la posición semi Fowler (30° a 45°) como forma de favorecer el retorno venoso cerebral minimizando riesgos de presiones intracraneales elevadas y mejorando la presión de perfusión cerebral<sup>52</sup>.

Posición supina prolongada puede conducir a atelectasias, NAV con deterioro en el intercambio de la función respiratoria, aumentando la presión parcial arterial de dióxido de carbono, y disminuyendo la presión parcial arterial de oxígeno, factores de daño secundarios<sup>45</sup>.

La posición de decúbito prono puede ser utilizada para mejorar la oxigenación con impacto positivo en términos de mortalidad en casos severos y refractarios. Sus efectos sobre la PIC son controvertidos, por ello deben emplearse según juicio clínico, poniendo en la balanza riesgos y beneficios<sup>53-55</sup>. Incrementa la presión intra-abdominal y está contraindicada en casos de fracturas de pelvis, lesión cuerda espinal e hipertensión intrabdominal e intracraneal severa.

Si se necesita recurrir al decúbito lateral, siempre acompañar de elevación de la cabeza para minimizar cambios en la PIC.

La posición de Trendelenburg no tiene cabida en el TEC severo por sus efectos deletéreos sobre la hemodinámica intracraneana.

La posición de Fowler baja (15-30 grados) en supino es la que se recomienda para los pacientes con aumento de la presión intracraneal.

La flexión de la cadera extrema puede aumentar la presión intra-abdominal y restringir el movimiento de diafragma y esfuerzo respiratorio. Puede causar aumento de la presión intracraneal por aumento de fenómenos de valsava.

La literatura actual considera seguros y necesarios los planes de intervención y movilización no solo con el concepto de “rehabilitación temprana” si no que además incorpora el concepto de rehabilitación oportuna<sup>58-64</sup>. Con ello los niveles de recomendaciones descritos por Hodgson y Stiller para intervenciones “en cama” y “fuera de cama” se han hecho fundamentales ya que su consenso de expertos incluye los tópicos de pacientes neurocríticos permitiendo realizar actividad fisioterapéutica con alto nivel de seguridad<sup>56, 57</sup>.

Por otra parte las intervenciones en etapa aguda pueden ser seguras con algunas precauciones de mayor nivel como considerar la sincronía de movilizaciones de extremidades en forma sincrónica con el ventilador mecánico evitando por ejemplo flexiones pasivas de cadera en extremidades inferiores en el momento de la inspiración del paciente por el riesgo de que esta posición aumente la presión intrabdominal y en cadena aumente la presión intratorácica con la consiguiente posibilidad de aumento de presión intracraneana<sup>58-64</sup>. El uso de sedación y analgesia profiláctico en pacientes más despiertos ayuda a tolerar mejor los procesos de rehabilitación mejorando su eficiencia<sup>58-64</sup>.

### *Recomendaciones*

- ✓ Considere el decúbito supino “semi fowler” como posición de elección en el manejo inicial del paciente neurocrítico y/o con politraumatismo asociado, hasta lograr estabilidad respiratoria y hemodinámica intracraneal y sistémica.
- ✓ Realice los cambios de posición o movilización con precaución y con la presencia de personal capacitado y entrenado.
- ✓ En presencia de enfermedad pulmonar unilateral, puede ser de utilidad transitoria, el decúbito lateral mediante el efecto “pulmón sano debajo”.
- ✓ Emplee y desarrolle protocolos de movilización oportuna y guiada.
- ✓ Evitar maniobras de valsalva.
- ✓ Asegure técnicas de movilización sincrónicas con los pacientes conectados a ventilación mecánica.
- ✓ Movilización y/o traslados del paciente que posea drenaje ventricular externo con drenaje distal cerrado.
- ✓ Evite la rotación de la cabeza y la flexión del cuello, dado que se asocian con cambios indeseados de las variables cerebrales.
- ✓ Utilice guías de práctica clínica y normas seguras para el traslado de pacientes.
- ✓ Mantenga siempre y en todo momento la monitorización del paciente.



## Bibliografia

1. O'Grady NP, Alexander M, Burns LA, Dellinger EP, Garland J, Heard SO, Lipsett PA, Masur H, Mermel LA, Pearson ML, Raad II, Randolph AG, Rupp ME, Saint S; Healthcare Infection Control Practices Advisory Committee (HICPAC). Guidelines for the prevention of intravascular catheter-related infections. *Clin Infect Dis*. 2011; 52: e162-93.
2. Leone M, Garnier F, Dubuc M, Bimar MC, Martin C. Prevention of nosocomial urinary tract infection in ICU patients: comparison of effectiveness of two urinary drainage systems. *Chest*. 2001; 120: 220-4.
3. <file:///C:/Users/Usuario/Desktop/cauti-guidelines.pdf>
4. López MJ, Cortés JA. Colonización e infección de la vía urinaria en el paciente críticamente enfermo. *Med Intensiva*. 2012; 36: 143-151.
5. Stroud M, Duncan H, Nightingale J; British Society of Gastroenterology. Guidelines for enteral feeding in adult hospital patients. *Gut*. 2003; 52 Suppl 7: vii1-vii12.
6. Pearce C, Duncan H. Enteral feeding. Nasogastric, nasojejunal, percutaneous endoscopic gastrostomy, or jejunostomy: its indications and limitations. *Postgrad Med J*. 2002; 78: 198–204.
7. Havelock T, Teoh R, Laws D, Gleeson F. Pleural procedures and thoracic ultra-sound: British Thoracic Society Pleural Disease Guideline 2010. *Thorax* 2010; 65: Suppl 2: ii61-ii76.23.
8. Chesnut R, Videtta W, Vespa P, Le Roux P; Participants in the International Multidisciplinary Consensus Conference on Multimodality Monitoring. Intracranial pressure monitoring: fundamental considerations and rationale for monitoring. *Neurocrit Care* 2014; Suppl 2: S64-84.
9. Tavakoli S, Peitz G, Ares W, Hafeez S, Grandhi R. Complications of invasive intracranial pressure monitoring devices in neurocritical care. *Neurosurg Focus*. 2017; 43: E6.
10. Slazinski. T., et al. Care of the patient undergoing intracranial pressure monitoring/external ventricular drainage or lumbar drainage. American Association of Neuroscience Nurses. 2011; <http://files.mmintensivecare.webnode.pt/200000471-ad055ad4d0/Intracranial%20Pressure%20Monitoring.pdf>
11. Holloway KL, Barnes T, Choi S, Bullock R, Marshall LF, Eisenberg HM, Jane JA, Ward JD, Young HF, Marmarou A. Ventriculostomy infections: the effect of monitoring duration and catheter exchange in 584 patients. *J Neurosurg*. 1996; 85: 419-24.
12. Beer R, Pfausler B, Schmutzhard E. Management of nosocomial external ventricular drain-related ventriculomeningitis. *Neurocrit Care*. 2009; 10: 363-7.
13. Tunkel AR, Hasbun R, Bhimraj A, Byers K, Kaplan SL, Michael Scheld W, van de Beek D, Bleck TP, Garton HJ, Zunt JR. 2017 Infectious Diseases Society of America's Clinical Practice Guidelines for Healthcare-Associated Ventriculitis and Meningitis. *Clin Infect Dis*. 2017; 64: e34-e65.
14. Zacchetti L, Magnoni S, Di Corte F, Zanier ER, Stocchetti N. Accuracy of intracranial pressure monitoring: systematic review and meta-analysis. *Crit Care*. 2015; 19: 420.
15. Masaoka T, Tack J. Gastroparesis: current concepts and management. *Gut Liver* 2009; 3: 166-173.
16. Ott L, Young B, Philips R, et al. Altered gastric emptying in the head injured patient: relationship to feeding intolerance. *J Neurosurg* 1991; 74: 738-742.
17. Schirmer CM, Kornbluth J, Heilman CB, Bhardwaj A. Gastrointestinal prophylaxis in neurocritical care. *Neurocrit Care* 2012; 16: 184-193.
18. Krenitsky J. Glucose control in the intensive care unit: a nutrition support perspective. *Nutr Clin Pract* 2011; 26: 31-43.
19. Btaiche IF, Chan LN, Pleva M, Kraft M. Critical illness, gastrointestinal complications and medication therapy during enteral feeding in critically ill adult patients. *Nutr Clin Pract* 2010; 25: 32-49.

20. Lade B, Umpierre V. Manejo del paciente con constipación. *Arch Med Interna* 2012; 34: 67-68.
21. Oczkowski S, Duan E, Groen A, Warren D, Cook D. The Use of Bowel Protocols in Critically Ill Adult Patients: A Sytematic Review and Meta-Analysis. *Crit Care Med* 2017; 45: 718-726.
22. Nassar A , Queiroz da Silva F, Cleva R. Constipation in intensive care unit: Incidence and risk factors, *J Crit Care* 2009; 24: 630e.
23. Montejo J, Gonzáles B, Montiel E. Complicaciones gastrointestinales en el paciente crítico. *Nutr Hosp* 2007; Supl: 256-62.
24. Ávila Couso L, Sibilla M, Trochon J, García M, Loewemberg T, Mesropian H, y col. Ensayo clínico controlado y aleatorizado. Constipación en pacientes con enfermedades neurológicas. Combinación de dos tratamientos (combinación de laxantes osmóticos y estimulantes). *Acta Gastroenterol Latinoam* 2016; 46: 192-200.
25. Cofré P, Germain F, Medina L, Orellana H, Suárez J, Vergara T. Manejo de la constipación crónica del adulto. *Rev Med Chile* 2008; 136: 507-516.
26. Wiesen P, van Gossum A, Preiser JC, Diarrhoea in the critically ill. *Curr Opin Crit Care* 2006; 12: 149-154.
27. Ferrie S, East V. Managing diarrhea in intensive care. *Aust J Crit Care* 2007; 20: 7-13.
28. Vieira LV, Pedrosa LAC, Souza VS, Paula CA, Rocha R. Incidence of diarrhea and associated risk factors in patients with traumatic brain injury and enteral nutrition. *Metab Brain Dis* 2018; E pub ahead of print: doi: 10.1007/s11011-018-0287-2
29. Marcon AP, Antar-Gamba M et al. Nosocomial diarrhoea in the intensive care unit. *Braz J Infect Dis* 2006; 10: 384-9.
30. Musher DM, Aslam S. Treatment of clostridium difficile colitis in the critical care setting. *Crit Care Clin* 2008; 24: 279-291.
31. Reddy M, Gill SS, Rochon PA. Preventing pressure ulcer: a systematic review. *JAMA* 2006 Aug 23; 296: 974-84.
32. Duncan KD. Preventing pressure ulcers:the goal is zero. *Jt Comm J Qual Patient Saf* 2007; 33: 605-10
33. Joint Commission International. Estándares de acreditación para hospitales [Internet] 5ta ed. Illinois: Oakbrook Terrace; 2014 [citado 20 junio 2017] Disponible en: <http://es.jointcommissioninternational.org/about/>
34. National Pressure Ulcer Advisory Panel. NPUAP Pressure Injury Stages. <http://www.npuap.org/resources/educational-and-clinical-resources/pressure-injury-staging-illustrations/>
35. Young J, Ernsting M, Kehoe A, Holmes K. Results of a clinician-led evidence-based task force initiative relating to pressure ulcer risk assessment and prevention. *J Wound Ostomy Continence Nurs*. 2010; 37: 495-503.
36. Pai AB, Zadov Y, Hickman A. Patient Safety in Rehabilitation Medicine. *Traumatic Brain Injury. Phys Med Rehabil Clin N Am* 2012; 23: 349-370.
37. Gray-Siracusa K, Schrier L. Use of an intervention bundle to eliminate pressure ulcers in critical care. *J Nurs Care Qual* 2011; 26: 216-25.
38. Mortenson WB, Miller WC, and the SCIRE Research Team. A review of scales for assessing the risk of developing a pressure ulcer in individuals with SCI. *Spinal Cord*. 2008; 46: 168–75.
39. Cox Jill. Predictors of Pressure ulcers in Adult critical care Patients. *AJCC [Internet]* September 2011 [citado 20 junio 2017]; 20(5) Disponible en: <http://dx.doi.org/10.4037/ajcc2011934>
40. Alderdend J, Rondinellib J, Peppera G, Cummins M, Whitney J. Risk factors for pressure injuries among critical care patients: A systematic review. *Int J Nurs Stud [Internet]* 2017; 71: 97–114.
41. National Pressure Ulcer Advisory Panel, European Pressure Ulcer Advisory Panel and Pan Pacific Pressure Injury Alliance. Prevention and Treatment of Pressure Ulcers: Quick Reference Guide [Internet] Emily Haesler, ed. Cambridge Media: Osborne Park (Australia); 2014 [citado 20 junio

- 2017] Disponible en: <http://www.npuap.org/wp-content/uploads/2014/08/Updated-10-16-14-Quick-Reference-Guide-DIGITAL-NPUAP-EPUAP-PPPIA-16Oct2014.pdf>
42. Johnson K, Petti J, Olson A, Custer T. Identifying barriers to early mobilisation among mechanically ventilated patients in a trauma intensive care unit. *Intensive Crit Care Nurs*. 2017; 42: 51-54.
  43. Martínez F., Galo Avendaño A., Brinkmann M., Cortés M, Carrillo L. Traslado de pacientes críticos. *Rev Hosp Clín Univ Chile* 2013; 25: 246 – 52.
  44. Kleffmann J, Pahl R, Deinsberger W, Ferbert A, Roth C. Intracranial Pressure Changes During Intrahospital Transports of Neurocritically Ill Patients. *Neurocrit Care*. 2016; 25: 440-445.
  45. Roth C, Stitz H, Kalhout A, Kleffmann J, Deinsberger W, Ferbert A. Effect of early physiotherapy on intracranial pressure and cerebral perfusion pressure. *Neurocrit Care* 2013; 18: 33-8.
  46. Roth C, Stitz H, Kalhout A, Kleffmann J, Deinsberger W, Ferbert A. Early Physiotherapy by Passive Range of Motion Does Not Affect Partial Brain Tissue Oxygenation in Neurocritical Care Patients. *J Neurol Surg* 2016.
  47. Cumming TB, Thrift AG, Collier JM, et al. Very early mobilization after stroke fast-tracks return to walking: further results from the phase II AVERT randomized controlled trial. *Stroke* 2011; 42: 153–158.
  48. Sottile PD, Nordon-Craft A, Malone D, Luby DM, Schenkman M, Moss. M. Physical Therapist Treatment of Patients in the Neurological Intensive Care Unit: Description of Practice. *Phys Ther*. 2015; 95: 1006-14.
  49. Thelander A, Nellgård B, Ricksten SE, Cider Å. Effects of Early Bedside Cycle Exercise on Intracranial Pressure and Systemic Hemodynamics in Critically Ill Patients in a Neurointensive Care Unit. *Neurocrit Care*. 2016; 25: 434-439.
  50. Hodgson CL, Stiller K, Needham DM, Tipping CJ, Harrold M, Baldwin CE, et al. Expert consensus and recommendations on safety criteria for active mobilization of mechanically ventilated critically ill adults. *Crit Care*. 2014; 18: 654–659.
  51. Johnson KL, Meyenburg T. Physiological Rationale and Current Evidence for Therapeutic Positioning of Critically Ill Patients. *AACN Advanced Critical Care* 2009. Volume 20, Number 3, pp.228–240.
  52. Hewitt N, Bucknall T, Faraone NM. Lateral positioning for critically ill adult patients (Review). *Cochrane Database of Systematic Reviews* 2016, Issue 5.
  53. Wang L, Li X, Yang Z, Tang X, Yuan Q, Deng L, Sun X. Semi-recumbent position versus supine position for the prevention of ventilator-associated pneumonia in adults requiring mechanical ventilation (Review) *Cochrane Database of Systematic Reviews* 2016, Issue 1. Art. No.: CD009946.
  54. Bloomfield R, Noble DW, Sudlow A. Prone position for acute respiratory failure in adults. *Cochrane Database of Systematic Reviews* 2015, Issue 11.
  55. Domínguez-Berrot AM. Decubito prono en pacientes con hipertensión endocraneal e insuficiencia respiratoria aguda grave. *Med Intensiva*. 2009; 33: 403–406.
  56. Roth C, Ferbert A, Deinsberger W, Kleffmann J, Kästner S, Godau J, Schüler M, Tryba M, Gehling M. Does prone positioning increase intracranial pressure? A retrospective analysis of patients with acute brain injury and acute respiratory failure. *Neurocrit Care*. 2014; 21: 186-91.
  57. dos Santos LJ, de Aguiar Lemos F, Bianchi T, Sachetti A, Dall'Acqua AM, da Silva Naue W, Dias AS, Vieira SR. Early rehabilitation using a passive cycle ergometer on muscle morphology in mechanically ventilated critically ill patients in the Intensive Care Unit (MoVe-ICU study): study protocol for a randomized controlled trial. *Trials*. 2015; 16: 383.
  58. Denehy L, Skinner EH, Edbrooke L, Haines K, Warrillow S, Hawthorne G, et al. Exercise rehabilitation for patients with critical illness: a randomized controlled trial with 12 months of follow-up. *Critical Care*. 2013; 17: 1

59. Göcze I, Strenge F, Zeman F, Creutzenberg M, Graf BM, Schlitt HJ and Bein T. The effects of the semirecumbent position on hemodynamic status in patients on invasive mechanical ventilation: prospective randomized multivariable analysis. *Critical Care* 2013; 17: R80: 2-9
60. Kumble S, Zink EK, Burch M, Deluzio S, Stevens RD, Bahouth MN. Physiological Effects of Early Incremental Mobilization of a Patient with Acute Intracerebral and Intraventricular Hemorrhage Requiring Dual External Ventricular Drainage. *Neurocrit Care*. 2017; 27: 115-119
61. Brissie MA, Zomorodi M, Soares-Sardinha S, Jordan JD. Development of a neuro early mobilisation protocol for use in a neuroscience intensive care unit. *Intensive Crit Care Nurs*. 2017; 42: 30-35.
62. Bakhru RN, McWilliams DJ, Wiebe DJ, Spuhler VJ, Schweickert WD. ICU structure variation and implications for early mobilization practices: an international survey. *Ann Am Thorac Soc*. 2016; 13: 1527–1537.
63. Taito S, Shime N, Ota K, Yasuda H. Early mobilization of mechanically ventilated patients in the intensive care unit. *J Intensive Care*. 2016; 4: 5.
64. Gisolf J, van Lieshout K, van Heusden F, Pott W, Stok J, Karemaker JM Human cerebral venous outflow pathway depends on posture and central venous pressure. *Physiol*. 2004; 560: 317–327.
